# Supplementary material for: A review of the applicability of the Motivations and Abilities (MOTA) framework for assessing the implementation success of water resources management plans and policies
Source: Copernicus journal article supplement (doi:10.5194/hess-2021-545), 2021-11-10
Supplement: Supplementary file 2 [file hess-2021-545-supplement.pdf]

## Supplement

**Table S1.** A summary of studies that have applied MOTA in various water resource management planning and policy contexts to date. ‘FITS’ refers to financial, institutional, technical and social within the context of abilities (‘FIT’ refers to the same but without the social aspect).

| Authors               | Trigger(s)                                                         | Motivation and ability elements                                                                                                                                                                                                                                           | Application of MOTA                                               | Institutional actor(s)                   | Societal actor(s)                          | Type of planning       |
|-----------------------|--------------------------------------------------------------------|---------------------------------------------------------------------------------------------------------------------------------------------------------------------------------------------------------------------------------------------------------------------------|-------------------------------------------------------------------|------------------------------------------|--------------------------------------------|------------------------|
| Phi et al. (2015)     | Flood management                                                   | Motivation, ability (FIT)                                                                                                                                                                                                                                                 | I- and A-MOTA: Governmental implementation and societal adoption  | National government                      | Community                                  | Top-down and bottom-up |
| Arora (2018)          | Adapting to salinity and modernising the agricultural sector       | Motivations identified by asking actors questions about perceptions on risks to livelihoods. Abilities identified by asking actors' questions about financial, technical and institutional abilities to change.                                                           | A-MOTA: Societal adoption                                         | None                                     | People's Committee (Provincial government) | Bottom-up              |
| Korbee et al. (2018)  | Adapting to salinity and modernising the agricultural sector       | Similar to those in Arora (2018)                                                                                                                                                                                                                                          | A-MOTA: Societal adoption                                         | Provincial and District-level government | Farmers                                    | Bottom-up              |
| Hoan et al. (2019)    | Saline intrusion associated with rising sea levels and development | Motivation (farmers' intention to change cropping systems), Abilities (FIT abilities to change cropping systems). Financial (budgets, production resources), technical (infrastructure and technique, knowledge and skills), institutional (social organisation, market). | A-MOTA: Societal adoption                                         | None                                     | Farmers                                    | Bottom-up              |
| Korbee et al. (2019b) | Adapting to salinity and modernising the agricultural sector       | Similar to those in Arora (2018)                                                                                                                                                                                                                                          | I- and A-MOTA: Institutional implementation and societal adoption | Unspecified                              | Farmers                                    | Top-down and bottom-up |
| Korbee et al. (2019a) | Adapting to salinity and modernising the agricultural sector       | Motivations identified by asking actors questions about perceptions on risks, possible solutions and institutional mandates. Abilities identified by asking actors' questions about FIT abilities to change.                                                              | I-MOTA: Governmental implementation                               | Local and Regional government agencies   | None                                       | Top-down               |
| Nguyen et al. (2019b) | Climate change, rising sea levels                                  | Motivation (farmers' intention to change cropping systems). Abilities (FIT abilities to change cropping systems).                                                                                                                                                         | A-MOTA: Societal adoption                                         | None                                     | Farmers                                    | Bottom-up              |

| Authors               | Trigger(s)                                                                                                                                                | Motivation and ability elements                                                                                                                                                                                                                                                                 | Application of MOTA                                                    | Institutional actor(s)                                                                       | Societal actor(s)                                                                                                       | Type of planning       |
|-----------------------|-----------------------------------------------------------------------------------------------------------------------------------------------------------|-------------------------------------------------------------------------------------------------------------------------------------------------------------------------------------------------------------------------------------------------------------------------------------------------|------------------------------------------------------------------------|----------------------------------------------------------------------------------------------|-------------------------------------------------------------------------------------------------------------------------|------------------------|
| Nguyen et al. (2019a) | Urban flood risk                                                                                                                                          | Assessed the motivation of each actor pertaining to the application of several conventional and retrofitting flood control measures. Abilities determined by assessing the self-perceived FIT capabilities in implementing flood control measures.                                              | A-MOTA: Societal adoption                                              | District-level Municipality Offices (DMO) and City-level Sectoral Departments (CSD)          | Social Mass Organisations (SMOs): Vietnam Fatherland Front Committee, Vietnam Women's Union, HCMC Communist Youth Union | Bottom-up              |
| Pieffers (2019)       | Diminishing groundwater and domestic water supplies                                                                                                       | Motivations assessed in terms of threat (knowledge about groundwater extraction and land subsidence) and risk (familiarity with the use of rainwater, stormwater and wastewater treatment; and risk in terms of perceived water quality) perception. FIT (and geographic conditions) abilities. | I- and A-MOTA: Experts, government officials and water supply stations | Division of Mineral and Water Resources, Government officials responsible for water mandates | Local communities                                                                                                       | Top-down and bottom-up |
| Kulsum (2020)         | Community livelihood adaptation uncertainties associated with urbanisation and climate change (irrigation water, agricultural technology, market system). | Similar to those in Korbee et al. (2019a)                                                                                                                                                                                                                                                       | A-MOTA: Societal adoption                                              | None                                                                                         | Farmers                                                                                                                 | Bottom-up              |
| Nguyen et al. (2020)  | Sustainability of mangrove shrimp farming in response to climate change-induced salinity intrusion along with economic and environmental constraints      | Motivation (farmers' intention to change from shrimp farming to another form of livelihood). Abilities (FITS abilities to change farming systems).                                                                                                                                              | A-MOTA: Societal adoption                                              | None                                                                                         | Mangrove-shrimp farmers                                                                                                 | Bottom-up              |
| Sadik et al. (2021)   | Announcement of new plans for participatory water management (PWM), increasing pressures from water management problems, and natural disasters            | Motivation is assessed by recognizing opportunity or threat from the proposed PWM reforms. Abilities (FITS) to participate in water resources management.                                                                                                                                       | A-MOTA: Societal adoption                                              | None                                                                                         | Farmers, local civil society organisations, and NGOs                                                                    | Bottom-up              |

## References

- Arora, G.: Bridging the gap between planning and implementation in strategic delta planning: Structuring implementation programming, M.S. thesis, Delft University of Technology, Delft, Netherlands, 134 pp., 2018.
- Hoan, N. X., Nguyen Khoi, D., and Trung, L. D.: Assessing the adaptive capacity of farmers under the impact of saltwater intrusion in the Vietnamese Mekong Delta, *J. Environ. Plan. Manag.*, 62, 1619-1635, 10.1080/09640568.2019.1631147, 2019.
- Korbee, D., Nguyen, H. Q., and Long, P. H.: Adding behavioural insights to improve the process of salinity adaptation in the Mekong Delta, Vietnam, EGU General Assembly Conference Abstracts, 15843,
- Korbee, D., Hong Quan, N., Hermans, L., and Ho Long, P.: Navigating the bureaucracy: An analysis of implementation feasibility for the Mekong Delta Plan, Vietnam, *J. Environ. Plan. Manag.*, 1545-1561, 10.1080/09640568.2019.1623014, 2019a.
- Korbee, D., Guerra, J. P., Nguyen, H. Q., Luan, P. D. M. H., and Hermans, L.: A tool to measure adoptability and implementability of plans: The Motivation and Ability (MOTA) framework, *Geophysical Research Abstracts*,
- Kulsum, U.: Supporting adaptive delta management: Systematic exploration of community livelihood adaptation as uncertainty, Ph.D. thesis, Delft University of Technology, Delft, Netherlands, 231 pp., 10.4233/uuid:3fea6d14-73a7-4d05-8d3e-36f8a03fd699, 2020.
- Nguyen, H. Q., Tran, D. D., Luan, P. D. M. H., Ho, L. H., Loan, V. T. K., Anh Ngoc, P. T., Quang, N. D., Wyatt, A., and Sea, W.: Socio-ecological resilience of mangrove-shrimp models under various threats exacerbated from salinity intrusion in coastal area of the Vietnamese Mekong Delta, *Int. J. Sustain. Dev. World Ecol.*, 27, 638-651, 10.1080/13504509.2020.1731859, 2020.
- Nguyen, H. Q., Radhakrishnan, M., Bui, T. K. N., Tran, D. D., Ho, L. P., Tong, V. T., Huynh, L. T. P., Chau, N. X. Q., Ngo, T. T. T., Pathirana, A., and Ho, H. L.: Evaluation of retrofitting responses to urban flood risk in Ho Chi Minh City using the Motivation and Ability (MOTA) framework, *Sustain. Cities Soc.*, 47, 101465, 10.1016/j.scs.2019.101465, 2019a.
- Nguyen, H. Q., Korbee, D., Ho, H. L., Weger, J., Phan, T. T. H., Nguyen, T. T. D., Pham, D. M. H. L., Luu, T. T., Dang, H. P. T., Ngo, T. T. T., Hermans, L., Evers, J., Wyatt, A., Chau, X. Q. N., and Ho, L. P.: Farmer adoptability for livelihood transformations in the Mekong Delta: A case in Ben Tre province, *J. Environ. Plan. Manag.*, 62, 1603–1618, 10.1080/09640568.2019.1568768, 2019b.
- Phi, H. L., Hermans, L. M., Douven, W. J. A. M., Van Halsema, G. E., and Khan, M. F.: A framework to assess plan implementation maturity with an application to flood management in Vietnam, *Water Int.*, 40, 984-1003, 10.1080/02508060.2015.1101528, 2015.
- Pieffers, T.: Small is beautiful, and feasible? Research into the feasibility of a decentralised domestic water provision in the Vietnamese Mekong Delta, M.S. thesis, Utrecht University, Utrecht, Netherlands, 2019.
- Sadik, M. S., Hermans, L. M., Evers, J., Nguyen, H. Q., Khan, M. F. A., and Ahmed, S.: Assessing the societal adoptability of participatory water management: an application of the Motivation and Ability (MOTA) framework, *Water Policy*, 00, 10.2166/wp.2021.255, 2021.
